# Supplementary material for: Identifying dual functions of rGO in a BiVO4/rGO/NiFe-layered double hydroxide photoanode for efficient photoelectrochemical water splitting
Source: Royal Society of Chemistry journal article supplement (doi:10.1039/d0ta04572a), 2020-01-01
Supplement: d0ta04572a1.pdf [file d0ta04572a1.pdf]

## Supporting Information

### **Identifying dual functions of rGO in a BiVO<sub>4</sub>/rGO/NiFe-layered double hydroxide photoanode for efficient photoelectrochemical water splitting**

Hua Chen,<sup>ab†</sup> Songcan Wang,<sup>bc†</sup> Jianzhong Wu,<sup>a</sup> Xiacong Zhang,<sup>d</sup> Jia Zhang,<sup>a</sup>

Miaoqiang Lyu,<sup>b</sup> Bin Luo,<sup>b</sup> Guangren Qian,<sup>\*a</sup> and Lianzhou Wang<sup>\*b</sup>

<sup>a</sup> School of Environmental and Chemical Engineering, Shanghai University, No. 333 Nanchen Rd., Shanghai 200444, P. R. China.

<sup>b</sup> Nanomaterials Centre, Australian Institute for Bioengineering and Nanotechnology and School of Chemical Engineering, The University of Queensland, Brisbane, Queensland 4072, Australia.

<sup>c</sup> Frontiers Science Center for Flexible Electronics (FSCFE), Shaanxi Institute of Flexible Electronics (SIFE) & Shaanxi Institute of Biomedical Materials and Engineering (SIBME), Northwestern Polytechnical University (NPU), 127 West Youyi Road, Xi'an 710072, China.

<sup>d</sup> Department of Polymer Materials, College of Materials Science and Engineering, Shanghai University, No. 333 Nanchen Rd., Shanghai 200444, P. R. China.

\* Corresponding authors: [grqian@shu.edu.cn](mailto:grqian@shu.edu.cn) (G. Qian); [l.wang@uq.edu.au](mailto:l.wang@uq.edu.au) (L. Wang)

† These authors contributed equally to this work.

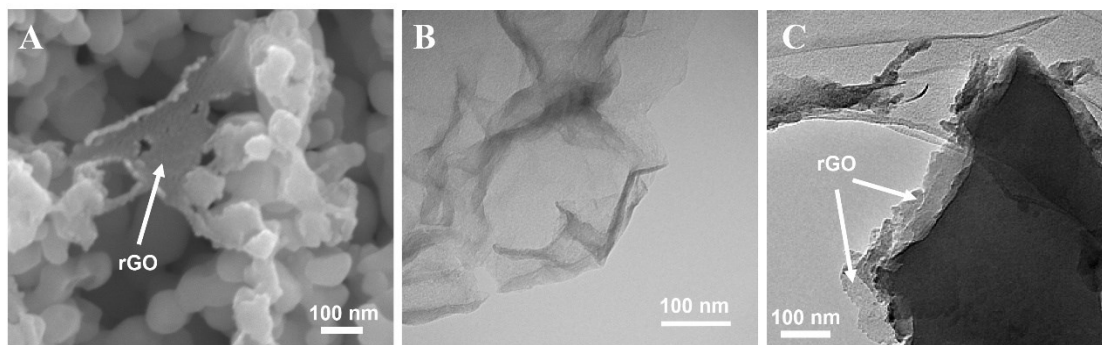

**Fig. S1** (A) High resolution SEM image of BiVO<sub>4</sub>/rGO. TEM images of (B) rGO and (C) BiVO<sub>4</sub>/rGO.

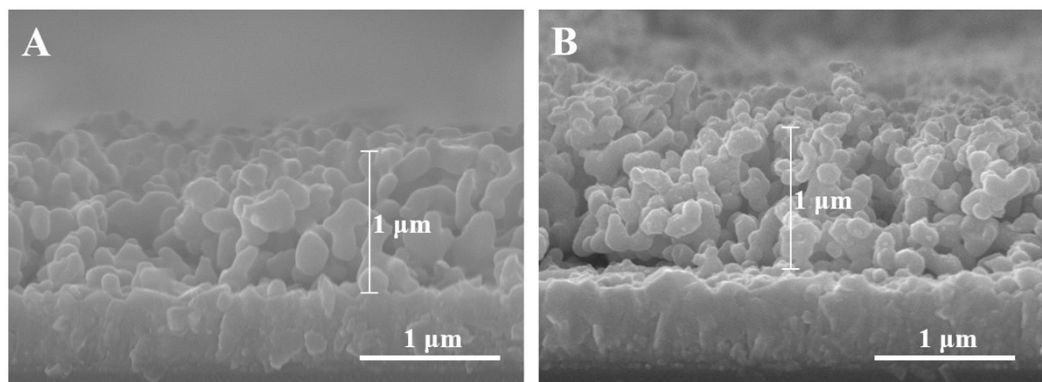

**Fig. S2** SEM cross-section of (A) BiVO<sub>4</sub>, and (B) BiVO<sub>4</sub>/rGO/NiFe-LDH.

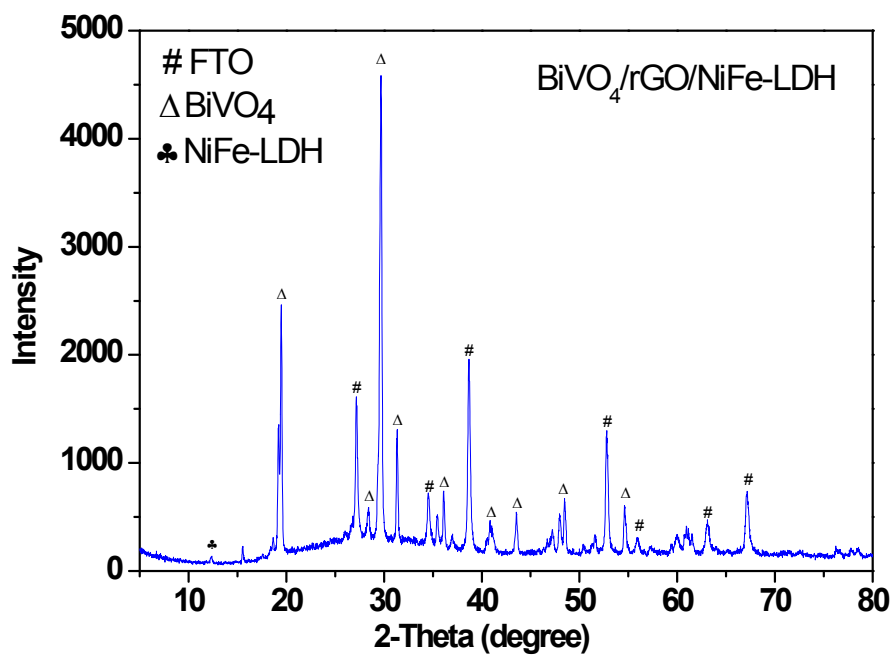

Fig. S3 XRD pattern of BiVO<sub>4</sub>/rGO/NiFe-LDH.

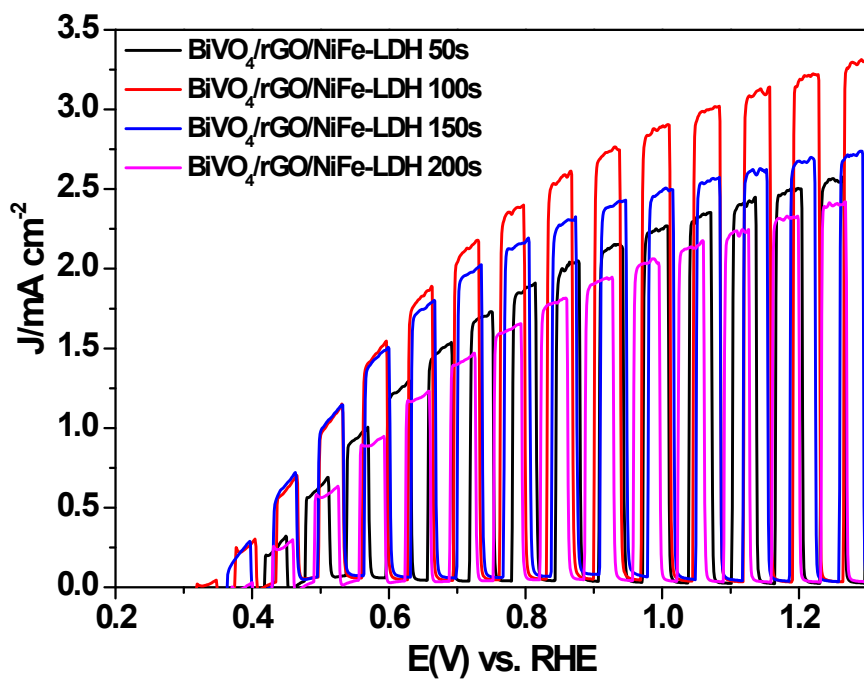

Fig. S4 LSV curves of BiVO<sub>4</sub>/rGO/NiFe-LDH with various LDH deposition time.

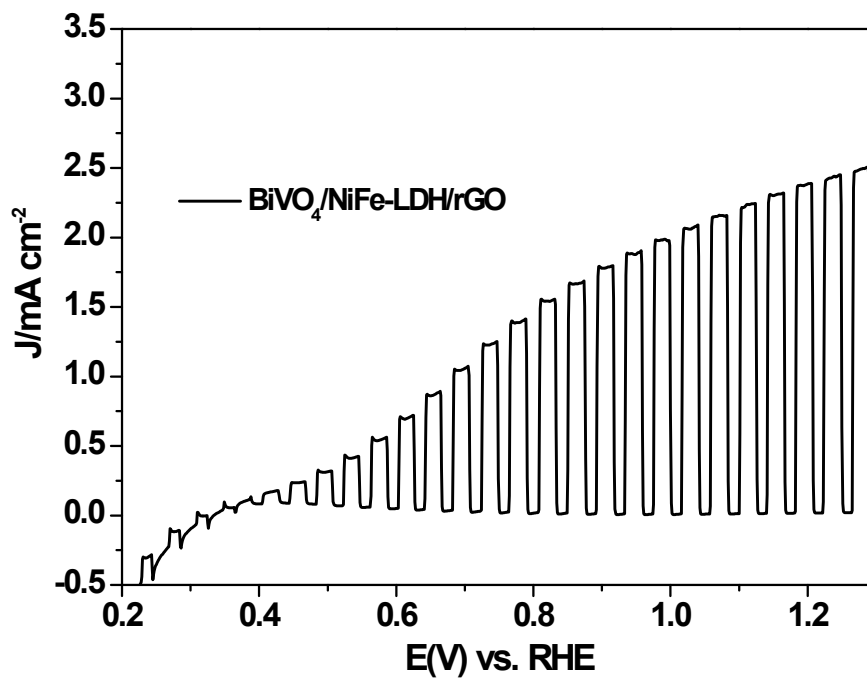

Fig. S5 LSV curves BiVO<sub>4</sub>/NiFe-LDH/rGO.

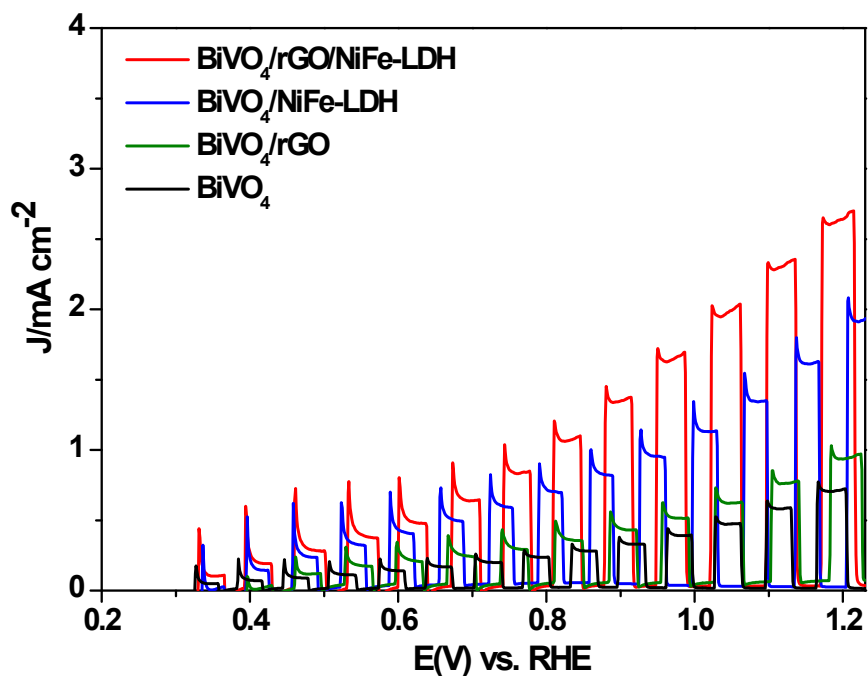

Fig. S6 LSV curves of the as-prepared photoanodes in 1 M KHPO<sub>4</sub> electrolyte (pH=7).

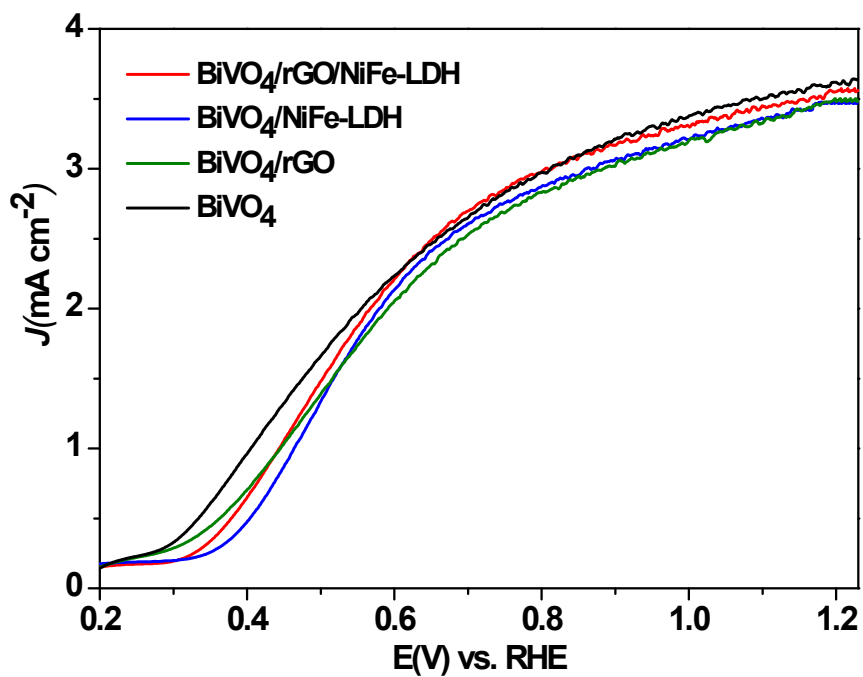

Fig. S7 LSV curves of the as-prepared photoanodes in the presence of 0.2 M Na<sub>2</sub>SO<sub>3</sub>.

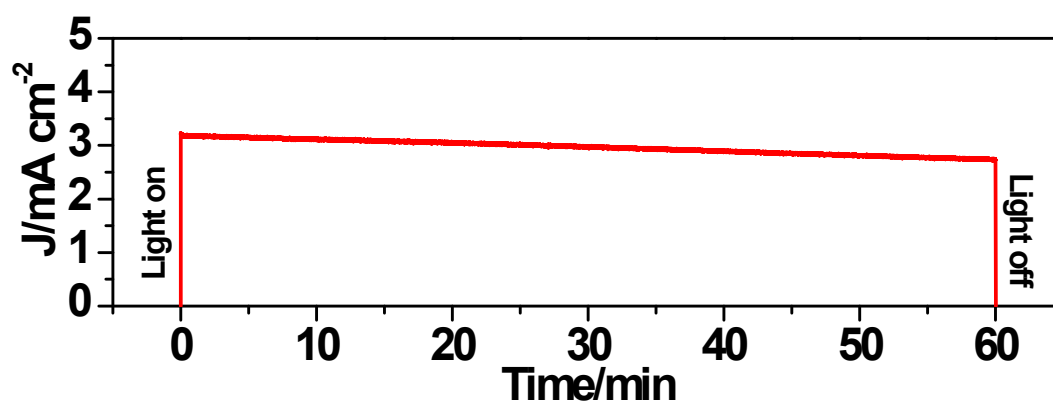

Fig. S8 Stability measurement of BiVO<sub>4</sub>/rGO/NiFe-LDH under consecutive AM 1.5 G illumination at 1.23 V vs. RHE.

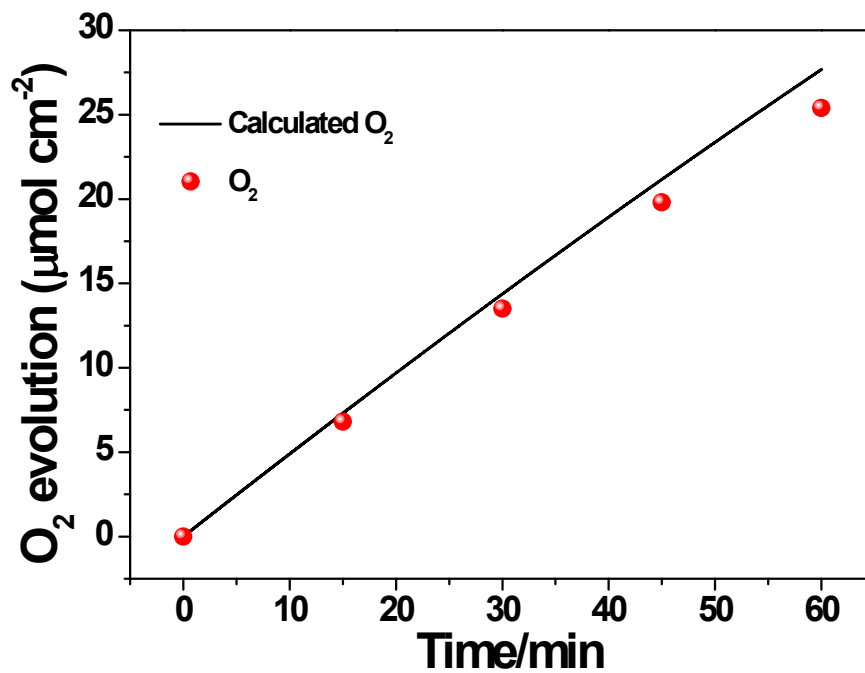

**Fig. S9** O<sub>2</sub> evolution of BiVO<sub>4</sub>/rGO/NiFe-LDH under consecutive AM 1.5 G illumination at 1.23 V vs. RHE.

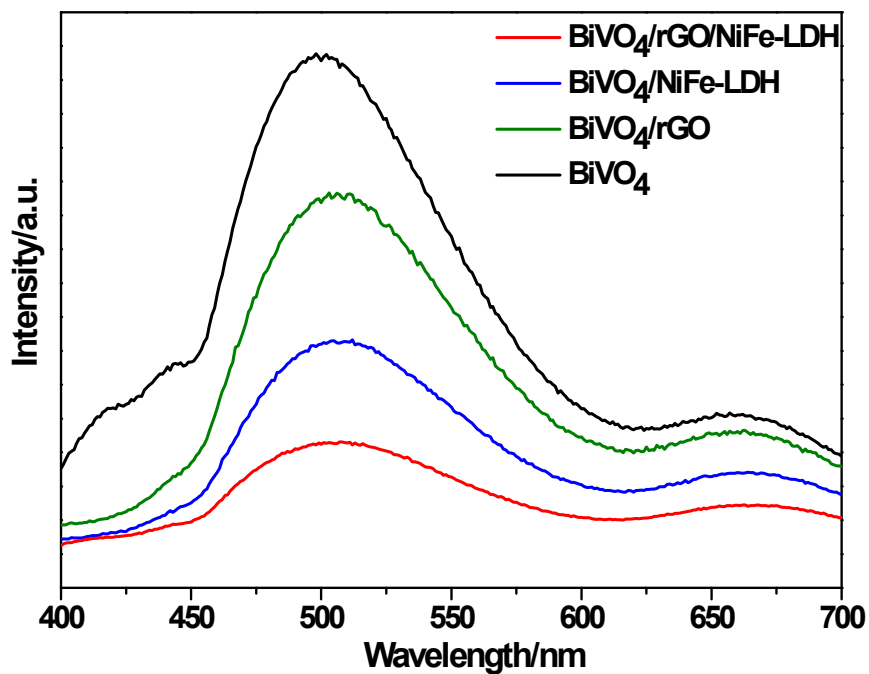

**Fig. S10** PL spectra of BiVO<sub>4</sub>, BiVO<sub>4</sub>/rGO, BiVO<sub>4</sub>/NiFe-LDH, and BiVO<sub>4</sub>/rGO/NiFe-LDH.

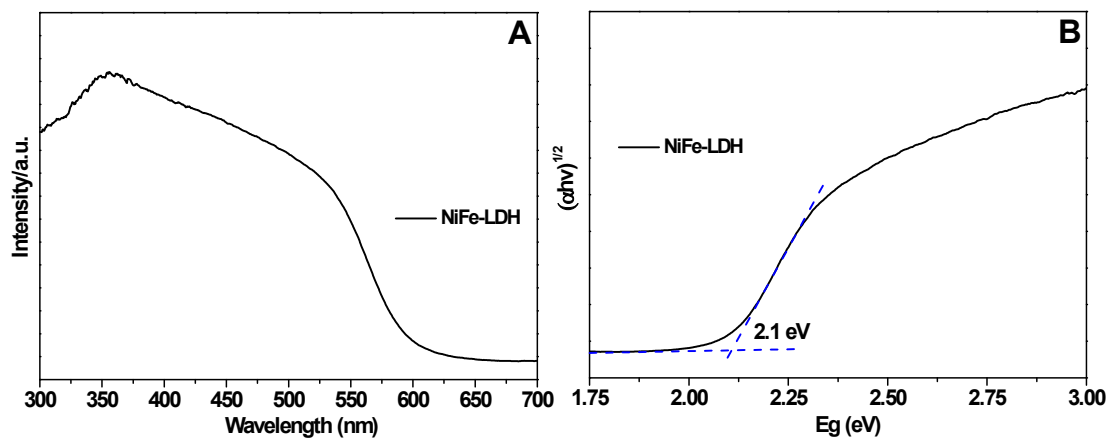

**Fig. S11** (A) UV-Vis diffuse reflectance spectra, and (B) Corresponding plot of transformed Kubelka-Munk function versus the energy of the light of NiFe-LDH.

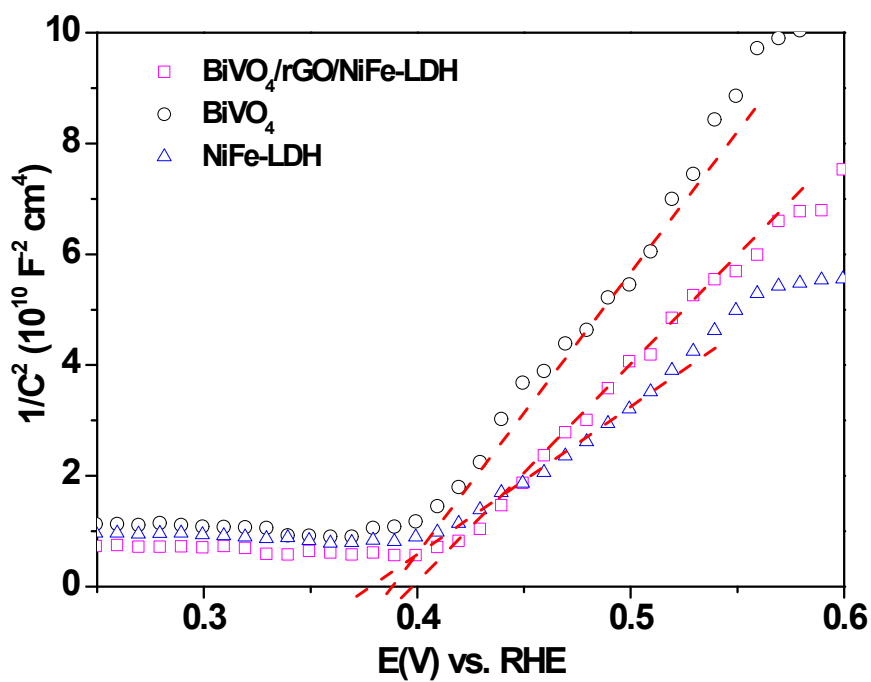

**Fig. S12** Mott-Schottky plots of NiFe-LDH, pristine BiVO<sub>4</sub> and BiVO<sub>4</sub>/rGO/NiFe-LDH measured in 1 kHz at room temperature in the dark.

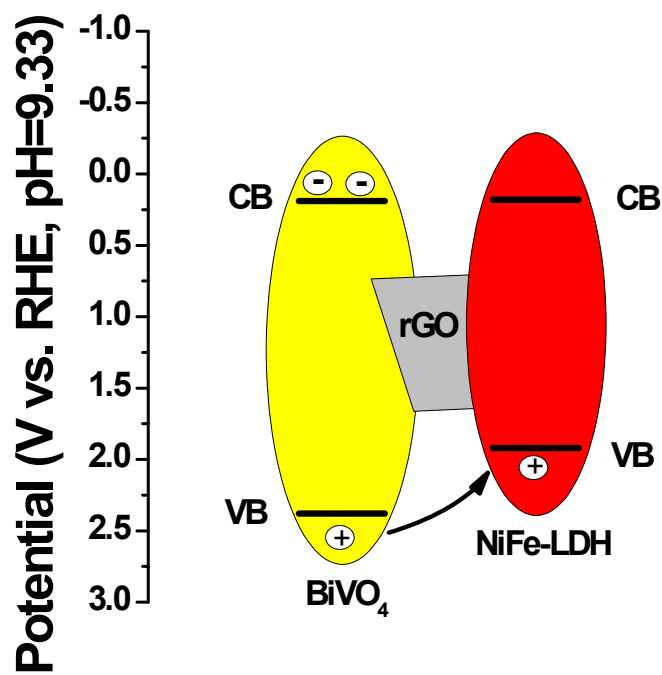

**Fig. S13** Band alignment and mechanism of charge separation for the  $\text{BiVO}_4/\text{rGO}/\text{NiFe-LDH}$  photoanode.

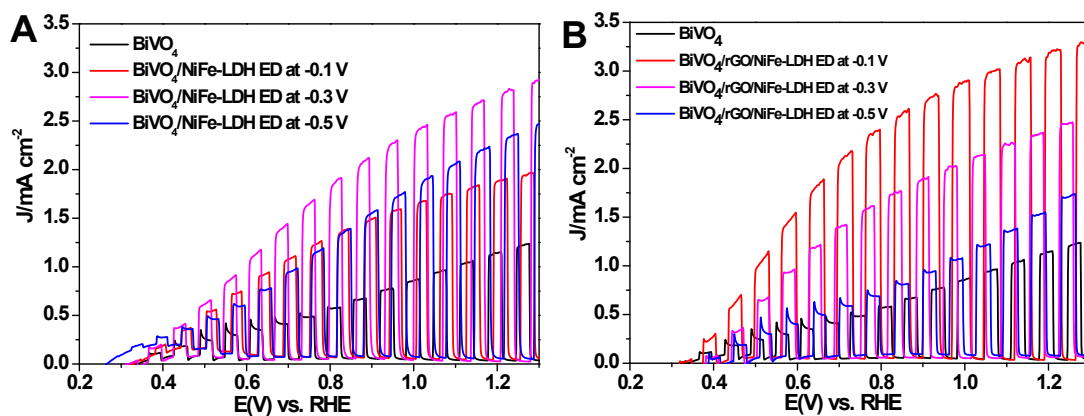

**Fig. S14** LSV curves of (A) Pristine  $\text{BiVO}_4$  and (B)  $\text{BiVO}_4/\text{rGO}$  with various LDH deposition potential (time for 100 s).



**Table S1** The fitted results of EIS data using the equivalent circuit in Fig. 5D.

| Samples                                    | $R_s/\Omega$   | $R_{ct}/\Omega$ |
|--------------------------------------------|----------------|-----------------|
| $\text{BiVO}_4$                            | $26.2 \pm 0.2$ | $540.0 \pm 4.5$ |
| $\text{BiVO}_4/\text{NiFe-LDH}$            | $21.0 \pm 0.1$ | $403.0 \pm 3.5$ |
| $\text{BiVO}_4/\text{rGO}/\text{NiFe-LDH}$ | $28.0 \pm 0.1$ | $248.0 \pm 2.4$ |
